# Supplementary material for: Integrated Analysis Identifies DPP7 as a Prognostic Biomarker in Colorectal Cancer
Source: MDPI journal article supplement (doi:10.3390/cancers15153954), 2023-08-03
Supplement: s1 [file s1]

Figure S1

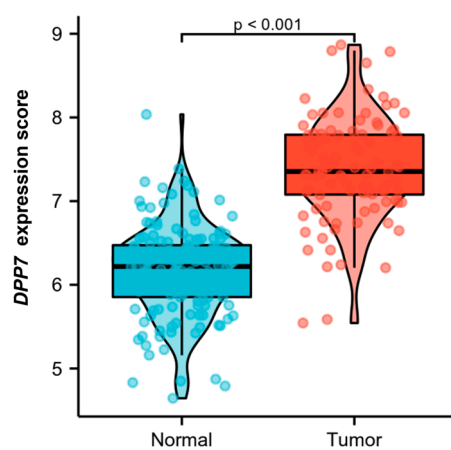

Figure S1. The expression of DPP7 in normal and CRC primary tissues based on GSE44076 dataset.

Table S1. The clinicopathological features in CRC patients based on the TCGA COAD and READ databases.

| Characteristic                 | classification            | COAD        | READ        |
|--------------------------------|---------------------------|-------------|-------------|
|                                |                           | database    | database    |
|                                |                           | cases       | cases       |
| n                              |                           | 478         | 166         |
| Gender, n (%)                  | Female                    | 226 (47.3%) | 75 (45.2%)  |
|                                | Male                      | 252 (52.7%) | 91 (54.8%)  |
| Race, n (%)                    | Asian                     | 11 (3.6%)   | 1 (1.1%)    |
|                                | Black or African American | 63 (20.6%)  | 6 (6.8%)    |
|                                | White                     | 232 (75.8%) | 81 (92%)    |
| Age, n (%)                     | <=65                      | 194 (40.6%) | 82 (49.4%)  |
|                                | >65                       | 284 (59.4%) | 84 (50.6%)  |
| T stage, n (%)                 | T1                        | 11 (2.3%)   | 9 (5.5%)    |
|                                | T2                        | 83 (17.4%)  | 28 (17.1%)  |
|                                | T3                        | 323 (67.7%) | 113 (68.9%) |
|                                | T4                        | 60 (12.6%)  | 14 (8.5%)   |
| N stage, n (%)                 | N0                        | 284 (59.4%) | 84 (51.9%)  |
|                                | N1                        | 108 (22.6%) | 45 (27.8%)  |
|                                | N2                        | 86 (18%)    | 33 (20.4%)  |
| M stage, n (%)                 | M0                        | 349 (84.1%) | 126 (84.6%) |
|                                | M1                        | 66 (15.9%)  | 23 (15.4%)  |
| Pathologic stage, n (%)        | Stage I                   | 81 (17.3%)  | 30 (19.2%)  |
|                                | Stage II                  | 187 (40%)   | 51 (32.7%)  |
|                                | Stage III                 | 133 (28.5%) | 51 (32.7%)  |
|                                | Stage IV                  | 66 (14.1%)  | 24 (15.4%)  |
| Primary therapy outcome, n (%) | PD                        | 25 (10%)    | 8 (12.9%)   |

| Characteristic             | classification | COAD        | READ        |
|----------------------------|----------------|-------------|-------------|
|                            |                | database    | database    |
|                            |                | cases       | cases       |
| BMI, n (%)                 | SD             | 4 (1.6%)    | 1 (1.6%)    |
|                            | PR             | 13 (5.2%)   | 3 (4.8%)    |
|                            | CR             | 208 (83.2%) | 50 (80.6%)  |
|                            | <25            | 87 (34%)    | 20 (27.4%)  |
|                            | >=25           | 169 (66%)   | 53 (72.6%)  |
| Residual tumor, n (%)      | R0             | 346 (92.5%) | 122 (89.7%) |
|                            | R1             | 4 (1.1%)    | 2 (1.5%)    |
|                            | R2             | 24 (6.4%)   | 12 (8.8%)   |
| CEA level, n (%)           | <=5            | 196 (64.7%) | 65 (58%)    |
|                            | >5             | 107 (35.3%) | 47 (42%)    |
| Lymphatic invasion, n (%)  | NO             | 266 (61.3%) | 84 (56.8%)  |
|                            | YES            | 168 (38.7%) | 64 (43.2%)  |
| Perineural invasion, n (%) | NO             | 135 (74.6%) | 40 (74.1%)  |
|                            | YES            | 46 (25.4%)  | 14 (25.9%)  |
